# Supplementary material
Source: Springer Nature journal article supplement (https://www.springermedizin.de/resource/supplementary/12884_2013_854_MOESM4_ESM.pdf/9458354)

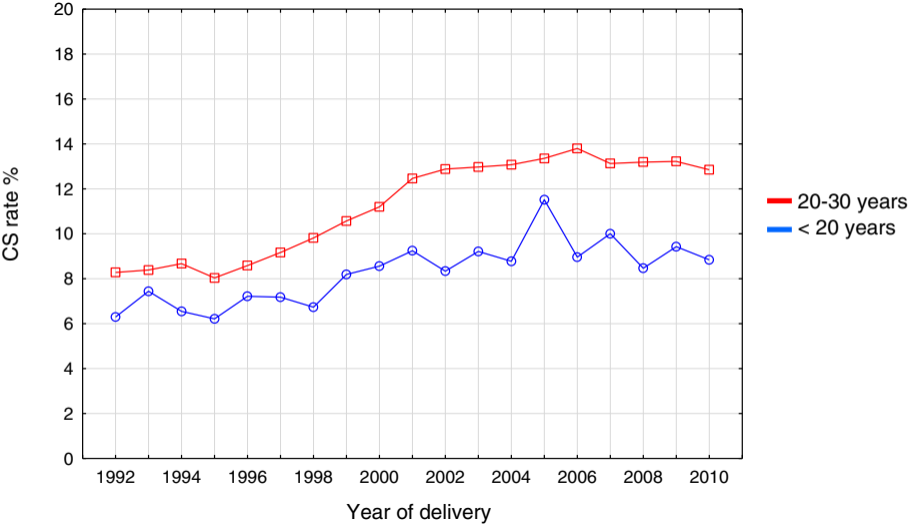

Supplement: MOESM4 [file 9458354]
